# Supplementary material for: Social Network Strategies to Distribute HIV Self-testing Kits: A Global Systematic Review and Network Meta-analysis
Source: bioRxiv or medRxiv preprint supplement (doi:10.1101/2023.11.05.23298135), 2023-11-06
Supplement: Supplementary file [file media-2.pdf]

## Table of Contents

|                                                                                                                                               |           |
|-----------------------------------------------------------------------------------------------------------------------------------------------|-----------|
| <b>S1(a) Table: HIVST distribution strategy details - No comparison group</b> .....                                                           | <b>2</b>  |
| <b>S1(b) Table: HIVST distribution strategy details - Comparison group</b> .....                                                              | <b>6</b>  |
| <b>S2 Table: Outcomes of the included studies</b> .....                                                                                       | <b>13</b> |
| <b>S3(a)Table: Network meta-analysis relative effects (league) table of HIVST distribution strategies - HIV testing uptake</b> .....          | <b>16</b> |
| <b>S3(b)Table: Network meta-analysis ranking probabilities of HIVST distribution strategies - HIV testing uptake</b> .....                    | <b>17</b> |
| <b>S4 Table: Linkage to ART or Any Care Among people living with HIV by Distribution Strategy, Study Design and Population Subgroup</b> ..... | <b>18</b> |
| <b>S5 Table: Risk of bias for included studies - Observational studies</b> .....                                                              | <b>19</b> |
| <b>S6 Table: Risk of bias for included studies – RCTs and a quasi-experimental study</b> .....                                                | <b>20</b> |
| <b>S1 Figure: Risk of bias for included studies – RCTs and a quasi-experimental study</b> .....                                               | <b>21</b> |

SD-HIVST systematic review and network meta-analysis: Supplementary Materials

S1(a) Table: HIVST distribution strategy details - No comparison group

| Study        | Method of identifying seeds                                                                                                                                            | Method of identifying network members                                                                                            | Role of social network                  | HIVST Delivery Method | Who distributed HIVST                                                 | Where HIVST delivered | How HIVST delivered | Testing choice offered                | Testing support                                                                                               | Additional intervention components                                                                                                |
|--------------|------------------------------------------------------------------------------------------------------------------------------------------------------------------------|----------------------------------------------------------------------------------------------------------------------------------|-----------------------------------------|-----------------------|-----------------------------------------------------------------------|-----------------------|---------------------|---------------------------------------|---------------------------------------------------------------------------------------------------------------|-----------------------------------------------------------------------------------------------------------------------------------|
| Kitenge 2022 | At PHCs, lay counsellors invited all users to participate. At community-based testing sites, CHWs introduced the study to all individuals visiting these sites.        | PRs distributed HIVST kits to their sexual partner, family members or anyone in their social network who was above 18 years old. | Accessing the hard to-reach & Diffusion | Secondary             | Lay counsellors or community health workers to peer to social network | Social network        | In person           | No                                    | Instruction on use                                                                                            | No                                                                                                                                |
| Kwan 2023    | Seed participants were recruited from various internet platforms, including social media platforms, a web-based forum, and location-based networking apps used by MSM. | Seed MSM participants invited their peers.                                                                                       | Accessing the hard to-reach & Diffusion | Secondary             | Web-based platform to participants to social network                  | Online                | Mail                | Yes (finger-prick or oral fluid test) | Real-time support, including in-person, video call, and instant messaging support, at kit request.            | Monetary incentive (To encourage return, an incentive of HK \$20 (US \$2.56) was given after manual verification of the result. ) |
| Lippman 2018 | Participants were recruited from all HIV-negative MpMS.                                                                                                                | Participants shared the kits with sexual partners and others with whom they felt safe distributing kits                          | Accessing the hard to-reach & Diffusion | Secondary             | HCW to participants to social network                                 | social network        | In person           | HIVST (oral fluid or blood)           | All participants were shown a demonstration on how to use both the oral fluid and fingerstick HIV self-tests. | No                                                                                                                                |

SD-HIVST systematic review and network meta-analysis: Supplementary Materials

| Study        | Method of identifying seeds                                                                 | Method of identifying network members                                                                                                        | Role of social network                                                                        | HIVST Delivery Method | Who distributed HIVST                                  | Where HIVST delivered | How HIVST delivered | Testing choice offered | Testing support                                                                                                                                                                                                                                                                         | Additional intervention components                                                                            |
|--------------|---------------------------------------------------------------------------------------------|----------------------------------------------------------------------------------------------------------------------------------------------|-----------------------------------------------------------------------------------------------|-----------------------|--------------------------------------------------------|-----------------------|---------------------|------------------------|-----------------------------------------------------------------------------------------------------------------------------------------------------------------------------------------------------------------------------------------------------------------------------------------|---------------------------------------------------------------------------------------------------------------|
| Li S 2021    | 6 key opinion leaders of MSM disseminated an HIVST recruitment advertisement to invite MSMs | IPs shared the HIVST service links on social media with their sexual partners and friends.                                                   | Accessing the hard to-reach & Diffusion                                                       | Online & mail         | HIVST application link for phone app to index to alter | Online                | Mail                | No                     | HIV posttest consultation                                                                                                                                                                                                                                                               | Monetary incentive (US \$2 was paid to participants who uploaded their test results)                          |
| Matovu 2020  | Community residents selected one peer-leader per social network grouping                    | Peer-leaders distributed kits to eligible social network members.                                                                            | Promote HIVST and increase linkage to HIV care among newly diagnosed HIV-positive individuals | Community -based      | HCW to Peer-educators to social network                | In community          | In person           | No                     | Peer-leaders received a training on oral HIV self-testing processes; basic counselling, communication and referral skills; and how to approach social network members at the time of distributing the kits;a practical demonstration of how the HIV self-testing exercise is conducted. | No                                                                                                            |
| Nasuuna 2022 | Recruitment of KP peers and pregnant and lactating mothers                                  | HIVST was implemented using peer-to-peer model for KPs and secondary distribution for partners of consenting pregnant and lactating mothers. | Accessing the hard to-reach & Diffusion                                                       | Secondary             | peer-to-peer/HCW to participants to partner            | In community          | In person           | No                     | 3-day trainings prior to distribution of HIVST kits. Education on how to use HIVST kits was provided in the local language                                                                                                                                                              | Phone call (Mothers and peers were asked to confirm delivery of the kits to recipients through a phone call.) |

SD-HIVST systematic review and network meta-analysis: Supplementary Materials

| Study            | Method of identifying seeds                                                                                                                                                     | Method of identifying network members                                                                                                                | Role of social network                                                                                              | HIVST Delivery Method | Who distributed HIVST                                         | Where HIVST delivered               | How HIVST delivered | Testing choice offered                                                 | Testing support                                                                                                                                                      | Additional intervention components |
|------------------|---------------------------------------------------------------------------------------------------------------------------------------------------------------------------------|------------------------------------------------------------------------------------------------------------------------------------------------------|---------------------------------------------------------------------------------------------------------------------|-----------------------|---------------------------------------------------------------|-------------------------------------|---------------------|------------------------------------------------------------------------|----------------------------------------------------------------------------------------------------------------------------------------------------------------------|------------------------------------|
| Nguyen 2019      | KPs and their partners were offered HIVST by peer-educators                                                                                                                     | Community-led outreach and social networks were used to promote HIVST.                                                                               | Promote HIVST and follow-up with self-testers                                                                       | Community-based       | HCW to Peer-educators to KP and their partners                | In community                        | In person           | Self-testers were given the choice to test with or without assistance. | Assisted HIVST                                                                                                                                                       | No                                 |
| Nguyen 2019      | KPs and their partners were offered HIVST by peer-educators                                                                                                                     | Both in-person and social network methods were used to mobilize key populations to test for HIV and offer HTS to partners of people living with HIV. | mobilize key populations to test for HIV and offer HTS to partners of people living with HIV                        | Community-based       | HCW to Peer-educators to KP and their partners                | In community                        | In person           | Yes: lay provider-delivered rapid testing / HIVST                      | Peer educators were trained to conduct rapid testing, perform and demonstrate self-testing, provide pre-test information and post-test counselling, and deliver aPN. | No                                 |
| Thirumurthy 2016 | HIV-uninfected women aged 18–39 years were recruited at a health facility with antenatal (ANC) and postpartum (PPC) clinics, and a drop-in center for female sex workers (FSW). | Male partners HIV-uninfected women                                                                                                                   | Increased coverage of HIV testing services for partners and the odds of partners being linked to care or prevention | Secondary             | HCW to women with high HIV incidence to their sexual partners | Partners among HIV-uninfected women | In person           | No                                                                     | Instructions on using the OraQuick Rapid HIV 1/2 Test and telephone support                                                                                          | No                                 |

SD-HIVST systematic review and network meta-analysis: Supplementary Materials

| Study        | Method of identifying seeds                                                                                       | Method of identifying network members                                                   | Role of social network                                                                                              | HIVST Delivery Method | Who distributed HIVST                                  | Where HIVST delivered | How HIVST delivered | Testing choice offered | Testing support                                                                                                                                                                                                                  | Additional intervention components                                                          |
|--------------|-------------------------------------------------------------------------------------------------------------------|-----------------------------------------------------------------------------------------|---------------------------------------------------------------------------------------------------------------------|-----------------------|--------------------------------------------------------|-----------------------|---------------------|------------------------|----------------------------------------------------------------------------------------------------------------------------------------------------------------------------------------------------------------------------------|---------------------------------------------------------------------------------------------|
| Wu D 2021    | MSMs were recruited from a social-media based online system                                                       | Index MSMs distributed the kits to other social contacts, including partners or friends | Accessing the hard to-reach & Diffusion                                                                             | Secondary             | HIVST application link for phone app to index to alter | Social network        | Mail                | No                     | Instruction on use and HIV post-test consultation                                                                                                                                                                                | Monetary incentive (US\$3 was provided to all participants who completed a questionnaire. ) |
| Zhang J 2021 | Participants were recruited from MSM in the ongoing PrEP pragmatic trial                                          | Participants shared HIVST with their male sexual partners.                              | Increased coverage of HIV testing services for partners and the odds of partners being linked to care or prevention | Secondary             | HCW to participants to partner                         | partners among MSM    | In person           | No                     | A service account on WeChat provided web-based services on the application of extra testing kits, instructions on self-testing, real-time consultation with the staff, uploading of test outcomes, and follow-up questionnaires. | Daily or on-demand PrEP                                                                     |
| Zishiri 2022 | Antenatal care (ANC) clinic attendees and people or those newly diagnosed with HIV clients were given HIVST kits. | Clinic attendees distributed HIVST kits to their partners.                              | Increased coverage of HIV testing services for partners and the odds of partners being linked to care or prevention | Secondary             | HCW to participants to partner                         | In community          | In person           | No                     | Instructions and demonstration of how to use                                                                                                                                                                                     | No                                                                                          |

S1(b) Table: HIVST distribution strategy details - Comparison group

| Study       | Method of identifying seeds                                                                                                                                                      | Method of identifying network members                                                                                                                                | Randomization method                                                                                                                                                                   | Role of social network                                                                                    | HIVST Delivery Method        | Who distributed HIVST                 | How HIVST delivered | Testing choice offered | Testing support                              | Additional intervention components                   | Comparison                         |
|-------------|----------------------------------------------------------------------------------------------------------------------------------------------------------------------------------|----------------------------------------------------------------------------------------------------------------------------------------------------------------------|----------------------------------------------------------------------------------------------------------------------------------------------------------------------------------------|-----------------------------------------------------------------------------------------------------------|------------------------------|---------------------------------------|---------------------|------------------------|----------------------------------------------|------------------------------------------------------|------------------------------------|
| Chanda 2017 | Recruitment of current or former FSWs as peer educators                                                                                                                          | Participants were recruited by peer educators.                                                                                                                       | Peer educator– participant groups were randomized as clusters in a 1:1:1 fashion to 1 of the 3 study arms                                                                              | Diffusion & Impact on risk and health behaviors                                                           | Facility & secondary by peer | HCW to Peer-educators to participants | In person           | No                     | Instructions for use and telephone support   | NA                                                   | Routine facility-based HIV testing |
| Choko 2019  | Women aged 18 years and older attending an ANC at primary care clinics, whose primary male partner was not known to be on ART were recruited.                                    | Women were given an invitation letter addressed to their male partner informing them of the importance of having an HIV test                                         | We block randomized ANC days (representing clusters of women) to 1 of 6 trial arms (standard of care [SOC] and 5 intervention arms; ratio 1:1:1:1:1:1).                                | Increased coverage of HIV testing services for men and the odds of men being linked to care or prevention | Secondary                    | HCW to participants to partners       | In person           | No                     | Instructions for use                         | Monetary incentive (\$3, \$10, and a phone reminder) | Routine facility-based HIV testing |
| Choko 2021  | Eligible women attending ANC were enrolled into the ANC clinic cohort and people newly diagnosed with HIV during routine clinic HIV testing were enrolled into the index cohort. | Eligible women provided with materials and brief training for their male partner. Index patients delivered materials to all sexual contacts over the past 12 months. | Restricted randomization (blocking) was used to randomize the 27 clusters to three arms in a ratio of 1:1:1, with district and HIV prevalence in ANC as the variables for restriction. | Accessing the hard to-reach & Diffusion                                                                   | Secondary                    | HCW to participants to partner        | In person           | No                     | Instructions and demonstration of how to use | Monetary incentive                                   | Routine facility-based HIV testing |

SD-HIVST systematic review and network meta-analysis: Supplementary Materials

| Study         | Method of identifying seeds                                                                                  | Method of identifying network members                                      | Randomization method                                                                                                                                                                                                                        | Role of social network                                                                                                                             | HIVST Delivery Method | Who distributed HIVST           | How HIVST delivered  | Testing choice offered | Testing support                                             | Additional intervention components              | Comparison                                                                              |
|---------------|--------------------------------------------------------------------------------------------------------------|----------------------------------------------------------------------------|---------------------------------------------------------------------------------------------------------------------------------------------------------------------------------------------------------------------------------------------|----------------------------------------------------------------------------------------------------------------------------------------------------|-----------------------|---------------------------------|----------------------|------------------------|-------------------------------------------------------------|-------------------------------------------------|-----------------------------------------------------------------------------------------|
| Dovel 2019    | Individuals living with HIV and on ART were recruited during routine ART clinic visits.                      | Partners of ART clients                                                    | Computer-generated randomization was used to assign clients to either the PRS or HIVST arms in a ratio of 1:2:5, respectively.                                                                                                              | Increased coverage of HIV testing services for partners and the odds of partners being linked to care or prevention                                | Secondary             | HCW to participants to partner  | In person            | No                     | Instructions and demonstration of how to use                | NA                                              | Routine facility-based HIV testing                                                      |
| Frye 2021     | Recruitment was conducted via online advertising, face-to face outreach and referrals by study participants. | Participants completed an online contact card and sent a link to a friend. | Participants were randomized as friend pairs in a 1:1 ratio into either the TRUST intervention or the time- and attention-matched control intervention arm using assignments generated by the study data analyst using Sealed Envelope Ltd. | Impact on risk and health behaviors. TRUST was designed to increase uptake of consistent (every three months) HST among YBMSM/TW in New York City. | Direct                | HCW to participants             | In person or Mail-in | No                     | Instructions for use and peer-based behavioral intervention | Monetary incentive                              | Time and attention control arm                                                          |
| Gichangi 2018 | The health facility nurse identified women attending first ANC and referred them to the trained study nurse. | Partner distribution in community                                          | Participants were individually randomized into 1 of the 3 study arms.                                                                                                                                                                       | Increased coverage of HIV testing services for men and the odds of men being linked to care or prevention                                          | Secondary             | HCW to participants to partners | In person            | No                     | Instructions for use                                        | Advise on partner negotiation and communication | Standard information card to invite male partners to the clinic for routine or HIV care |

SD-HIVST systematic review and network meta-analysis: Supplementary Materials

| Study          | Method of identifying seeds                                                                                                                                                      | Method of identifying network members                                                                                                                              | Randomization method                                                                                                                         | Role of social network                                                                                    | HIVST Delivery Method | Who distributed HIVST            | How HIVST delivered | Testing choice offered | Testing support                                 | Additional intervention components                                                                                                                                                                         | Comparison                                   |
|----------------|----------------------------------------------------------------------------------------------------------------------------------------------------------------------------------|--------------------------------------------------------------------------------------------------------------------------------------------------------------------|----------------------------------------------------------------------------------------------------------------------------------------------|-----------------------------------------------------------------------------------------------------------|-----------------------|----------------------------------|---------------------|------------------------|-------------------------------------------------|------------------------------------------------------------------------------------------------------------------------------------------------------------------------------------------------------------|----------------------------------------------|
| Joseph 2022    | Recruitment of WLHIV who were attending HTS, HIV care/treatment services or antenatal care services by the research team and clinic staff                                        | WLHIV's male partners                                                                                                                                              | Participants were randomized 1:1 using a random number table by participant identifier (ID)                                                  | Increased coverage of HIV testing services for men and the odds of men being linked to care or prevention | Secondary             | HCW to participants to partner   | In person           | No                     | Instructions for use and telephone support      | NA                                                                                                                                                                                                         | Routine facility-based HIV testing           |
| Lightfoot 2018 | The peer recruiters were identified from HIV-related support groups, local gay bars, online social networking and dating apps, community-based organizations, and word of mouth. | The peer recruiters distributed OraQuick oral fluid HIV test kits to friends who they believed were AAMSM or LMSM, age 18–45, and had not tested in the last year. | N/A                                                                                                                                          | Peers, who were most effective at reaching infrequent, and non-testers.                                   | Secondary             | HCW to Peers to social network   | In person           | No                     | Instructions for use                            | Monetary incentive (Each peer received \$150 after distribution of all 5 HIVST tests. Testers had the alternative option to provide contact information for receipt of cash or another gift card for \$25. | Testers in County Testing Program            |
| MacGowan 2020  | Persons who clicked the ads on social network, music, and dating websites were directed to research sites to complete eligibility screening.                                     | Distribution HIV self-tests to social network members                                                                                                              | Participants were randomly assigned to the self-testing (ST) arm or control arm using a computer-generated stochastic random 1:1 allocation. | Accessing the hard to-reach & Diffusion                                                                   | Secondary             | Website online to index to alter | mail                | No                     | Instruction enhancement, video or study hotline | NA                                                                                                                                                                                                         | Website with routine HIV testing information |
| Masters 2016   | Trained research assistants screened and enrolled women seeking ANC or PPC at the three facilities, in a private location away from regular clinic activities.                   | Partner distribution in community                                                                                                                                  | Participants were randomized in a 1:1 ratio using balanced block randomization (block size 20) to an HIVST group or a comparison group.      | Increased coverage of HIV testing services for men and the odds of men being linked to care or prevention | Secondary             | HCW to participants to partners  | In person           | No                     | Instructions and demonstration of how to use    | Advise on partner negotiation and communication                                                                                                                                                            | Invitation card for clinic-based HIV testing |



SD-HIVST systematic review and network meta-analysis: Supplementary Materials

| Study         | Method of identifying seeds                                                               | Method of identifying network members                                                                    | Randomization method                                                                                                                            | Role of social network                                                                                    | HIVST Delivery Method | Who distributed HIVST                                | How HIVST delivered | Testing choice offered | Testing support                                                    | Additional intervention components                                                                                                                                                                                                 | Comparison                         |
|---------------|-------------------------------------------------------------------------------------------|----------------------------------------------------------------------------------------------------------|-------------------------------------------------------------------------------------------------------------------------------------------------|-----------------------------------------------------------------------------------------------------------|-----------------------|------------------------------------------------------|---------------------|------------------------|--------------------------------------------------------------------|------------------------------------------------------------------------------------------------------------------------------------------------------------------------------------------------------------------------------------|------------------------------------|
| Merchant 2018 | Via multiple social media platforms                                                       | YMSMs recommended three other 18–24-year-old black, Hispanic, or white YMSM.                             | Within each racial/ethnic group, we randomly assigned participants into one of three study arms (1:1:1 randomization) using block sizes of six. | Accessing the hard to-reach & Diffusion                                                                   | Online & mail         | Website/ Study app to participants to social network | Mail                | No                     | No                                                                 | Monetary incentive (Participants received a \$10 internet-based gift card for completing the follow-up questionnaire, and up to three \$5 gift cards for providing email addresses of other YMSM to be contacted about the study.) | Routine facility-based HIV testing |
| Mujugira 2022 | PWLHIV attending antenatal care who reported that their partner's HIV status was unknown. | Secondary distribution of HIV self-test kits (HIVST) from HIV-negative pregnant women to their partners. | Eligible participants were randomized 2:1 to HIVST secondary distribution or an invitation for fast-track HIV testing for their partner.        | Increased coverage of HIV testing services for men and the odds of men being linked to care or prevention | Secondary             | HCW to participants to partner                       | In person           | No                     | trained in the use and interpretation of HIVST                     | NA                                                                                                                                                                                                                                 | Routine facility-based HIV testing |
| Okoboi 2020   | Fifteen MSM peers who trained in HIVST testing procedures and results interpretation      | Peers distributed HIVST kits to MSM in their social and sexual networks.                                 | N/A                                                                                                                                             | Increasing testing coverage among non-testers.                                                            | Secondary             | HCW to Peers to social network                       | In person           | No                     | Instructions and demonstration of how to use and telephone support | Transport reimbursement and T-shirts, backpacks and umbrellas as tokens of appreciation                                                                                                                                            | Routine facility-based HIV testing |

SD-HIVST systematic review and network meta-analysis: Supplementary Materials

| Study         | Method of identifying seeds                                                                              | Method of identifying network members                                                                        | Randomization method                                                                                                                                  | Role of social network                                                                                                                                          | HIVST Delivery Method        | Who distributed HIVST                 | How HIVST delivered | Testing choice offered                                                                      | Testing support                                                                                                                         | Additional intervention components                                                                                                                                                                                       | Comparison                                  |
|---------------|----------------------------------------------------------------------------------------------------------|--------------------------------------------------------------------------------------------------------------|-------------------------------------------------------------------------------------------------------------------------------------------------------|-----------------------------------------------------------------------------------------------------------------------------------------------------------------|------------------------------|---------------------------------------|---------------------|---------------------------------------------------------------------------------------------|-----------------------------------------------------------------------------------------------------------------------------------------|--------------------------------------------------------------------------------------------------------------------------------------------------------------------------------------------------------------------------|---------------------------------------------|
| Ortblad 2017  | Recruitment of FSW peer educators                                                                        | Peer-educators recruitment, research assistants telephone screening, eligibility assessment, and enrollment. | We randomized FSW peer educator groups 1:1:1 to 1 of 3 study arms.                                                                                    | Have good access to other FSWs and are able to engage with FSWs who do not normally utilize the health system & Diffusion & Impact on risk and health behaviors | Facility & secondary by peer | HCW to Peer-educators to participants | In person           | No                                                                                          | Instructions for use and telephone support                                                                                              | NA                                                                                                                                                                                                                       | Routine facility-based HIV testing          |
| Pettifor 2020 | Recruitment of young women from Agincourt Health and Social Demographic Surveillance System (AHDSS)      | Young women offered test kits/invitations to peers and sexual partners.                                      | Young women ages 18-26 were randomized using block randomization with a 1:1 allocation to either                                                      | Secondary distribution of HIV self-test kits is one way to reach populations who test less frequently and hard-to-reach groups.                                 | Secondary                    | HCW to index to alter                 | In person           | Yes (choice of either a clinic-based HCT invitation or oral HIV Self-Testing (HIVST) kits.) | Instructions for use, include pre- and post-test counseling information and a “frequently asked questions” document on HIV self-testing | NA                                                                                                                                                                                                                       | Routine facility-based HIV testing          |
| Sha 2022      | Community volunteers or public health workers invited men who visited the three clinics for HIV testing. | Indexes distributed HIV/syphilis dual self-testing kits to people in their social networks.                  | The two arms were implemented one at a time to compare the intended outcomes in similar catchment areas without having people choose between the two. | Accessing the hard to-reach & Diffusion                                                                                                                         | Secondary                    | HCW to index to alter                 | In person           | No                                                                                          | Instructions for use                                                                                                                    | Monetary incentive (Indexes received \$3 after completing the baseline survey and \$5 for a follow-up survey. Alters and corresponding indexes both received an additional \$3 when alters uploaded their test results.) | Testing card referral (facility-based test) |

SD-HIVST systematic review and network meta-analysis: Supplementary Materials

| Study            | Method of identifying seeds                                                                          | Method of identifying network members                                                | Randomization method                                                                                                                                                            | Role of social network                                                                                                                                                  | HIVST Delivery Method        | Who distributed HIVST                 | How HIVST delivered | Testing choice offered | Testing support                                                                                                                                                                     | Additional intervention components | Comparison                         |
|------------------|------------------------------------------------------------------------------------------------------|--------------------------------------------------------------------------------------|---------------------------------------------------------------------------------------------------------------------------------------------------------------------------------|-------------------------------------------------------------------------------------------------------------------------------------------------------------------------|------------------------------|---------------------------------------|---------------------|------------------------|-------------------------------------------------------------------------------------------------------------------------------------------------------------------------------------|------------------------------------|------------------------------------|
| Shahmanshah 2021 | Recruitment of 24 pairs of peer navigators through local municipal and traditional leaders           | Peer navigators recruited young people in community settings near schools and homes. | The final groupings of peer navigators into three arms were completed using statistical software, into three groups of 8 pairs and three floating peer navigators (A, B and C). | Diffusion & Impact on risk and health behaviors                                                                                                                         | Facility & secondary by peer | HCW to Peer-educators to participants | In person           | No                     | In all three arms, peer navigators promoted sexual health and the benefits of HIV testing PrEP and ART. In both intervention arms, they also demonstrated how to use the HIVST kit. | Monetary incentive                 | Routine facility-based HIV testing |
| Young 2013       | 18 peer leaders were recruited from community organizations serving African American and Latino MSM. | Participants were recruited from ads on Internet and social networking sites         | Participants were randomly and blindly assigned to 1 of 2 intervention or control groups and then randomly assigned to 2 peer leaders within that group.                        | Diffusion & Impact on risk and health behaviors. The community peer leader model is designed to increase HIV prevention and testing behaviors by changing social norms. | Direct                       | HCW to Peer-educators to participants | Mail-in             | No                     | Instructions for use                                                                                                                                                                | NA                                 | General health information         |

SD-HIVST systematic review and network meta-analysis: Supplementary Materials

| Study             | Method of identifying seeds                                                                                                     | Method of identifying network members                                                                                                                                                                             | Randomization method                                                                                                                             | Role of social network                                                                                                                                                  | HIVST Delivery Method | Who distributed HIVST                 | How HIVST delivered | Testing choice offered | Testing support                                                                                          | Additional intervention components                                                                                                                                                                        | Comparison                         |
|-------------------|---------------------------------------------------------------------------------------------------------------------------------|-------------------------------------------------------------------------------------------------------------------------------------------------------------------------------------------------------------------|--------------------------------------------------------------------------------------------------------------------------------------------------|-------------------------------------------------------------------------------------------------------------------------------------------------------------------------|-----------------------|---------------------------------------|---------------------|------------------------|----------------------------------------------------------------------------------------------------------|-----------------------------------------------------------------------------------------------------------------------------------------------------------------------------------------------------------|------------------------------------|
| Young 2022        | 79 peer leaders were recruited with help from community organizations serving Latinx and African American MSM.                  | From online advertisements on Facebook, Craigslist, and other websites/application s; community physical venues frequented by Latinx and African American MSM; and from direct referrals from study participants. | Using a random number generator with participants blinded to assignment and unable to request group or condition assignment.                     | Diffusion & Impact on risk and health behaviors. The community peer leader model is designed to increase HIV prevention and testing behaviors by changing social norms. | Direct                | HCW to Peer-educators to participants | Mail-in             | No                     | Instructions for use and communicate in the online community, by sending messages, chats, and wall posts | NA                                                                                                                                                                                                        | Non-peer-led HIVST                 |
| Van Der Elst 2017 | Mobilizations were done through GBMSM peers from a local GBMSM-led community group                                              | GBMSM peers mobilized in community                                                                                                                                                                                | NA                                                                                                                                               | Accessing the hard to-reach & Diffusion                                                                                                                                 | Secondary             | HCW to Peers to social network        | In person           | No                     | Close supervision and daily feedback                                                                     | Participants asked to report for confirmatory HTC at the clinic                                                                                                                                           | Routine facility-based HIV testing |
| Zhou 2022         | Volunteers of Xutong enrolled participants by advertising the recruitment and trial introduction in the WeChat public platform. | Index participants distributed HIVST kits to members within their social networks.                                                                                                                                | Eligible participants were randomly assigned to one of the 3 arms individually and independently by a computer-generated program electronically. | Accessing the hard to-reach & Diffusion                                                                                                                                 | Secondary             | HCW to index to alter                 | Mail-in             | No                     | Instructions for use                                                                                     | Monetary incentive (Index participants in the 2 intervention groups could receive a fixed incentive (\$3 USD) online for the verified test result uploaded to the digital platform by each unique alter.) | Standard secondary distribution    |

S2 Table: Outcomes of the included studies

| Study         | Study arm                          | HIV testing uptake |                         |                               | HIV seroconversion |                       |                         | Linkage to ART or HIV care among HIV positive |                       |                       |                       |
|---------------|------------------------------------|--------------------|-------------------------|-------------------------------|--------------------|-----------------------|-------------------------|-----------------------------------------------|-----------------------|-----------------------|-----------------------|
|               |                                    | Time point         | Offered HIVST           | Tested for HIVST              | Time point         | All positive          | Tested for HIVST1       | Time point                                    | ART initiation        | Linked to HIV care    | HIV positive          |
| Chanda 2017   | Standard of care                   | 2016.9-2017.2      | 1mom: 296,<br>4mon: 301 | 1mom: 262,<br>4mon: 226       | 2016.9-2017.2      | 1mom: 59,<br>4mon: 84 | 1mom: 288,<br>4mon: 298 | 2016.9-2017.2                                 | 1mom: 27,<br>4mon: 54 | 1mom: 44,<br>4mon: 72 | 1mom: 59,<br>4mon: 84 |
| Chanda 2017   | Delivery                           | 2016.9-2017.2      | 1mom: 296,<br>4mon: 295 | 1mom: 280,<br>4mon: 248       | 2016.9-2017.2      | 1mom: 49,<br>4mon: 74 | 1mom: 294,<br>4mon: 292 | 2016.9-2017.2                                 | 1mom: 11,<br>4mon: 35 | 1mom: 25,<br>4mon: 53 | 1mom: 49,<br>4mon: 74 |
| Chanda 2017   | Coupon                             | 2016.9-2017.2      | 1mom: 294,<br>4mon: 302 | 1mom: 248,<br>4mon: 241       | 2016.9-2017.2      | 1mom: 36,<br>4mon: 77 | 1mom: 291,<br>4mon: 300 | 2016.9-2017.2                                 | 1mom: 9,<br>4mon: 44  | 1mom: 19,<br>4mon: 59 | 1mom: 36,<br>4mon: 77 |
| Choko 2019    | Standard of care                   | 28 days            | 408                     | 71                            | 28 days            | 3                     | 71                      | 28 days                                       | 3                     | -                     | 3                     |
| Choko 2019    | Partner distribution in community  | 28 days            | 1941                    | 1801                          | 28 days            | 43                    | 1801                    | 28 days                                       | 39                    | -                     | 43                    |
| Choko 2021    | Standard of care                   | 28 days            | ANC:1447<br>index:234   | ANC:498<br>index:209          | 28 days            | index:9<br>ANC:2      | index:209               | -                                             | ANC:2                 | -                     | index:9<br>ANC:2      |
| Choko 2021    | HIVST                              | 28 days            | ANC:1465<br>index:169   | ANC:1106<br>index:155         | 28 days            | index:13<br>ANC:0     | index:155               | -                                             | ANC:0                 | -                     | index:13<br>ANC:0     |
| Choko 2021    | HIVST plus                         | 28 days            | ANC:1632<br>index:305   | ANC:1000<br>index:285         | 28 days            | index:32<br>ANC:22    | index:285               | -                                             | ANC:22                | -                     | index:32<br>ANC:22    |
| Dovel 2019    | Standard of care                   | 2018.3-2018.6      | 107                     | 27                            | -                  | 4                     | 27                      | 12 months                                     | 3                     | -                     | 4                     |
| Dovel 2019    | Partner distribution in community  | 2018.3-2018.6      | 258                     | 183                           | -                  | 30                    | 183                     | 12 months                                     | 14                    | -                     | 30                    |
| Frye 2021     | Standard of care                   | 2016.7-2019.1      | 197                     | 3 months: 83<br>6 months: 83  | -                  | -                     | -                       | -                                             | -                     | -                     | -                     |
| Frye 2021     | Peer-based behavioral intervention | 2016.7-2019.1      | 179                     | 3 months: 102<br>6 months: 97 | -                  | -                     | -                       | -                                             | -                     | -                     | -                     |
| Gichangi 2018 | Standard of care                   | 3 months           | 938                     | 239                           | -                  | -                     | -                       | -                                             | -                     | -                     | -                     |

SD-HIVST systematic review and network meta-analysis: Supplementary Materials

|                |                                   |                |                         |                         |                |                       |                         |                |                       |                       |                       |
|----------------|-----------------------------------|----------------|-------------------------|-------------------------|----------------|-----------------------|-------------------------|----------------|-----------------------|-----------------------|-----------------------|
| Gichangi 2018  | Partner distribution in community | 3 months       | 472                     | 322                     | -              | -                     | -                       | -              | -                     | -                     | -                     |
| Joseph 2022    | Standard of care                  | 3 months       | 85                      | 44                      | 3 months       | 6                     | 44                      | 3 months       | 6                     | -                     | 6                     |
| Joseph 2022    | Partner distribution in community | 3 months       | 91                      | 66                      | 3 months       | 9                     | 66                      | 3 months       | 6                     | -                     | 9                     |
| Lightfoot 2018 | Self-Testers                      | 2016.1-2017.3  | 165                     | 114                     | 2016.1-2017.3  | 7                     | 114                     | -              | -                     | -                     | 7                     |
| Lightfoot 2018 | Testers in County Testing Program | 2016.1-2017.3  | 3483                    | 1205                    | 2016.1-2017.3  | 18                    | 1205                    | -              | -                     | -                     | 18                    |
| MacGowan 2020  | Standard of care                  | 2015.3-2016.11 | -                       | -                       | 2015.3-2016.11 | -                     | -                       | -              | -                     | -                     | -                     |
| MacGowan 2020  | Peer community distribution HIVST | 2015.3-2016.11 | 2864                    | 2301                    | 2015.3-2016.11 | 34                    | 2301                    | -              | -                     | 26                    | 36                    |
| Masters 2016   | Standard of care                  | 3 months       | 286                     | 148                     | 3 months       | 4                     | 148                     | -              | -                     | 3                     | 4                     |
| Masters 2016   | Partner distribution in community | 3 months       | 284                     | 258                     | 3 months       | 8                     | 258                     | -              | -                     | 2                     | 8                     |
| Merchant 2018  | Standard of care                  | 3 months       | 71                      | 10                      | -              | -                     | -                       | -              | -                     | -                     | -                     |
| Merchant 2018  | mail-testing                      | 3 months       | 57                      | 14                      | -              | -                     | -                       | -              | -                     | -                     | -                     |
| Merchant 2018  | Online & mail distribution        | 3 months       | 82                      | 17                      | -              | -                     | -                       | -              | -                     | -                     | -                     |
| Mujugira 2022  | Standard of care                  | 12 months      | 161                     | 75                      | 12 months      | 13                    | 75                      | 12 months      | 10                    | -                     | 13                    |
| Mujugira 2022  | Partner distribution in community | 12 months      | 328                     | 159                     | 12 months      | 36                    | 159                     | 12 months      | 25                    | -                     | 36                    |
| Okoboi 2020    | Standard of care                  | 2018.6-2018.8  | -                       | 147                     | 2018.1-2018.3  | 4                     | 147                     | -              | -                     | -                     | 4                     |
| Okoboi 2020    | Peer community distribution       | 2018.6-2018.8  | 150                     | 143                     | 2018.6-2018.8  | 8                     | 143                     | -              | 8                     | 8                     | 8                     |
| Ortblad 2017   | Peer community distribution HIVST | 2016.10-2017.3 | 1mom: 289,<br>4mon: 262 | 1mom: 275,<br>4mon: 261 | 2016.10-2017.3 | 1mom: 39,<br>4mon: 44 | 1mom: 287,<br>4mon: 260 | 2016.10-2017.3 | 1mom: 13,<br>4mon: 19 | 1mom: 17,<br>4mon: 27 | 1mom: 39,<br>4mon: 44 |
| Ortblad 2017   | HCW at health facility            | 2016.10-2017.3 | 1mom: 321,<br>4mon: 297 | 1mom: 258,<br>4mon: 288 | 2016.10-2017.3 | 1mom: 54,<br>4mon: 80 | 1mom: 312,<br>4mon: 289 | 2016.10-2017.3 | 1mom: 10,<br>4mon: 27 | 1mom: 13,<br>4mon: 37 | 1mom: 54,<br>4mon: 80 |
| Ortblad 2017   | Standard-of-care                  | 2016.10-2017.3 | 1mom: 316,<br>4mon: 302 | 1mom: 226,<br>4mon: 263 | 2016.10-2017.3 | 1mom: 39,<br>4mon: 53 | 1mom: 301,<br>4mon: 294 | 2016.10-2017.3 | 1mom: 13,<br>4mon: 24 | 1mom: 25,<br>4mon: 37 | 1mom: 39,<br>4mon: 53 |
| Pettifor 2020  | Peer community distribution       | 3 months       | 373                     | 119                     | 3 months       | 4                     | 119                     | -              | -                     | -                     | 4                     |

SD-HIVST systematic review and network meta-analysis: Supplementary Materials

|                   |                                        |                 |      |     |                |    |     |           |       |     |    |
|-------------------|----------------------------------------|-----------------|------|-----|----------------|----|-----|-----------|-------|-----|----|
| Pettifor 2020     | Standard of care                       | 9 months        | 406  | 114 | 9 months       | 8  | 114 | -         | -     | -   | 8  |
| Pettifor 2020     | Peer community distribution            | 9 months        | 701  | 393 | 9 months       | 14 | 393 | -         | -     | -   | 14 |
| Sha 2022          | Secondary distribution                 | 2019.5-2020.1   | 179  | 139 | 2019.5-2020.1  | 8  | 139 | -         | -     | -   | 8  |
| Sha 2022          | Testing card referral                  | 2019.10-2020.1  | 26   | 1   | 2019.10-2020.1 | 0  | 1   | -         | -     | -   | 0  |
| Shahmanesh 2021   | Standard of care                       | 2019.3-2019.9   | 1098 | -   | -              | -  | -   | -         | -     | 111 | -  |
| Shahmanesh 2021   | Direct HIVST distribution              | 2019.3-2019.9   | 1480 | -   | -              | -  | -   | -         | -     | 111 | -  |
| Shahmanesh 2021   | Peer community distribution            | 2019.3-2019.9   | 1585 | -   | -              | -  | -   | -         | -     | 50  | -  |
| Young 2013        | Standard of care                       | 2011.3-2011.6   | 11   | 2   | -              | -  | -   | -         | -     | -   | -  |
| Young 2013        | Peer-leaders distribution in community | 2011.3-2011.6   | 25   | 9   | -              | -  | -   | -         | -     | -   | -  |
| Young 2022        | Standard of care                       | 2017.2-2021.1   | 450  | 102 | -              | -  | -   | -         | -     | -   | -  |
| Young 2022        | Peer-leaders distribution in community | 2017.2-2021.1   | 450  | 130 | -              | -  | -   | -         | -     | -   | -  |
| Van Der Elst 2017 | Standard of care                       | -               | -    | -   | 2015.7-2015.12 | 24 | 690 | 1 Day(s)  | 20/24 | -   | 24 |
| Van Der Elst 2017 | Peer community distribution HIVST      | -               | -    | -   | 2016.3-2016.6  | 29 | 337 | 14 Day(s) | 24/29 | -   | 29 |
| Zhou 2022         | control                                | 2019.10-2020.12 | 65   | 58  | -              | 6  | 58  | -         | -     | -   | 6  |
| Zhou 2022         | SD-M                                   | 2019.10-2020.12 | 107  | 101 | -              | 4  | 101 | -         | -     | -   | 4  |
| Zhou 2022         | SD-M-PR                                | 2019.10-2020.12 | 187  | 185 | -              | 5  | 185 | -         | -     | -   | 5  |

HIV testing uptake among all randomized or enrolled; HIV positivity among HIV tested; Linkage to ART or HIV care among HIV positive.

S3(a)Table: Network meta-analysis relative effects (league) table of HIVST distribution strategies - HIV testing uptake

|                                | <b>Facility-based testing</b> | <b>Peer-community</b> | <b>Partner-community</b> | <b>Peer educator-community</b> |
|--------------------------------|-------------------------------|-----------------------|--------------------------|--------------------------------|
| <b>Facility-based testing</b>  | <b>Facility-based testing</b> | 2.59 (1.41, 5.20)     | 1.95 (1.29, 2.95)        | 1.22 (0.68, 2.18)              |
| <b>Peer-community</b>          | 0.38 (0.19, 0.71)             | <b>Peer-community</b> | 0.75 (0.33, 1.56)        | 0.47 (0.19, 1.07)              |
| <b>Partner-community</b>       | 0.51 (0.34, 0.77)             | 1.33 (0.64, 3.00)     | <b>Partner-community</b> | 0.63 (0.30, 1.27)              |
| <b>Peer educator-community</b> | 0.82 (0.46, 1.47)             | 2.14 (0.93, 5.30)     | 1.60 (0.79, 3.28)        | <b>Peer educator-community</b> |



S3(b)Table: Network meta-analysis ranking probabilities of HIVST distribution strategies - HIV testing uptake

| <b>Testing and distribution strategy</b> | <b>Probability of ranking 1</b> | <b>Probability of ranking 2</b> | <b>Probability of ranking 3</b> | <b>Probability of ranking 4</b> |
|------------------------------------------|---------------------------------|---------------------------------|---------------------------------|---------------------------------|
| <b>Facility-based testing</b>            | 0.00                            | 0.00                            | 0.24                            | 0.76                            |
| <b>Peer-community</b>                    | 0.79                            | 0.19                            | 0.02                            | 0.00                            |
| <b>Partner-community</b>                 | 0.20                            | 0.72                            | 0.08                            | 0.00                            |
| <b>Peer educator-community</b>           | 0.00                            | 0.09                            | 0.66                            | 0.23                            |

S4 Table: Linkage to ART or Any Care Among people living with HIV by Distribution Strategy, Study Design and Population Subgroup

| Strategy                 | Design | Population Type              | Pooled Risk Ratio | Studies                                |
|--------------------------|--------|------------------------------|-------------------|----------------------------------------|
| Peer-community           | Cohort | MSM                          | 0.99 [0.78, 1.27] | Van Der Elst 2017                      |
| Partner-community        | RCT    | Male partners of ANC clients | 0.83 [0.60, 1.16] | Choko 2019, Masters 2016, Choko 2021 a |
|                          | RCT    | Partners of HIV positive     | 0.79 [0.60, 1.04] | Joseph 2022, Mujugira 2022, Dovel 2019 |
| Peer educators-community | RCT    | FSW                          | 0.80 [0.63, 1.02] | Chanda 2017, Ortblad 2017              |

S5 Table: Risk of bias for included studies - Observational studies

| Study             | Representativeness of exposed cohort | Selection of non-exposed cohort | Ascertainment of exposure | Demonstration that outcome of interest was not present at start of study | Cohorts comparable | Assessment of outcome | Length of follow-up | Loss to follow-up rate | Overall Quality |
|-------------------|--------------------------------------|---------------------------------|---------------------------|--------------------------------------------------------------------------|--------------------|-----------------------|---------------------|------------------------|-----------------|
| Kwan 2023         | *                                    | -                               | *                         | *                                                                        | -                  | *                     | *                   | *                      | Good            |
| Kitenge 2022      | *                                    | *                               | *                         | *                                                                        | -                  | *                     | *                   | -                      | Good            |
| Lightfoot 2018    | *                                    | -                               | *                         | -                                                                        | *                  | *                     | -                   | *                      | Fair            |
| Lippman 2018      | *                                    | *                               | *                         | *                                                                        | *                  | -                     | *                   | -                      | Good            |
| Li S 2021         | *                                    | -                               | *                         | *                                                                        | -                  | -                     | *                   | -                      | Poor            |
| Matovu 2020       | *                                    | -                               | *                         | *                                                                        | -                  | -                     | *                   | *                      | Fair            |
| Nasuuna 2022      | *                                    | -                               | *                         | *                                                                        | -                  | -                     | *                   | *                      | Fair            |
| Nguyen 2019 1     | *                                    | *                               | -                         | -                                                                        | -                  | *                     | -                   | -                      | Poor            |
| Nguyen 2019 2     | *                                    | *                               | *                         | -                                                                        | -                  | *                     | -                   | -                      | Poor            |
| Okoboi 2020       | *                                    | *                               | *                         | *                                                                        | -                  | *                     | *                   | -                      | Good            |
| Thirumurthy 2016  | *                                    | *                               | *                         | *                                                                        | -                  | *                     | *                   | *                      | Good            |
| Van Der Elst 2017 | *                                    | *                               | *                         | -                                                                        | -                  | -                     | *                   | *                      | Fair            |
| Wu D 2021         | *                                    | -                               | *                         | *                                                                        | -                  | *                     | *                   | *                      | Good            |
| Zhang J 2021      | *                                    | -                               | *                         | *                                                                        | -                  | -                     | *                   | *                      | Fair            |
| Zishiri 2022      | *                                    | -                               | *                         | *                                                                        | -                  | -                     | *                   | *                      | Fair            |

S6 Table: Risk of bias for included studies – RCTs and a quasi-experimental study

| Study           | Random sequence generation<br>(selection bias) | Allocation concealment<br>(selection bias) | Blinding of participants and personnel<br>(performance bias) | Blinding of outcome assessment<br>(detection bias) | Incomplete outcome data<br>(attrition bias) | Selective reporting<br>(reporting bias) | Other bias |
|-----------------|------------------------------------------------|--------------------------------------------|--------------------------------------------------------------|----------------------------------------------------|---------------------------------------------|-----------------------------------------|------------|
| Chanda 2017     | Low                                            | Low                                        | Low                                                          | Low                                                | Low                                         | Low                                     | Low        |
| Choko 2019      | Low                                            | Low                                        | High                                                         | High                                               | Low                                         | Low                                     | Low        |
| Choko 2021      | Low                                            | Low                                        | High                                                         | Low                                                | Low                                         | Low                                     | Low        |
| Dovel 2019      | Unclear                                        | Unclear                                    | High                                                         | High                                               | Low                                         | Low                                     | Unclear    |
| Frye 2021       | Low                                            | Low                                        | High                                                         | High                                               | Low                                         | Low                                     | Low        |
| Gichangi 2018   | Low                                            | Low                                        | High                                                         | High                                               | Low                                         | Low                                     | Low        |
| Joseph 2022     | Low                                            | Low                                        | High                                                         | Unclear                                            | Low                                         | Low                                     | Low        |
| MacGowan 2020   | Low                                            | Low                                        | High                                                         | High                                               | High                                        | Low                                     | Unclear    |
| Masters 2016    | Low                                            | Low                                        | High                                                         | High                                               | Low                                         | Low                                     | Low        |
| Merchant 2018   | Low                                            | Unclear                                    | High                                                         | High                                               | Unclear                                     | Low                                     | Low        |
| Mjugira 2022    | Low                                            | Unclear                                    | High                                                         | High                                               | Unclear                                     | Low                                     | Unclear    |
| Ortblad 2017    | Low                                            | Low                                        | Low                                                          | Low                                                | Low                                         | Low                                     | Low        |
| Pettifor 2020   | Low                                            | Low                                        | High                                                         | High                                               | Low                                         | Low                                     | Low        |
| Sha 2022        | High                                           | High                                       | High                                                         | Unclear                                            | High                                        | Low                                     | Low        |
| Shahmanesh 2021 | Low                                            | Low                                        | High                                                         | Low                                                | Unclear                                     | Low                                     | Low        |
| Young 2022      | Low                                            | Low                                        | High                                                         | Unclear                                            | Low                                         | Low                                     | Low        |
| Young 2013      | Low                                            | Unclear                                    | High                                                         | High                                               | Unclear                                     | Low                                     | Low        |
| Zhou 2022       | Low                                            | Low                                        | High                                                         | Low                                                | Low                                         | Low                                     | Low        |

S1 Figure: Risk of bias for included studies – RCTs and a quasi-experimental study

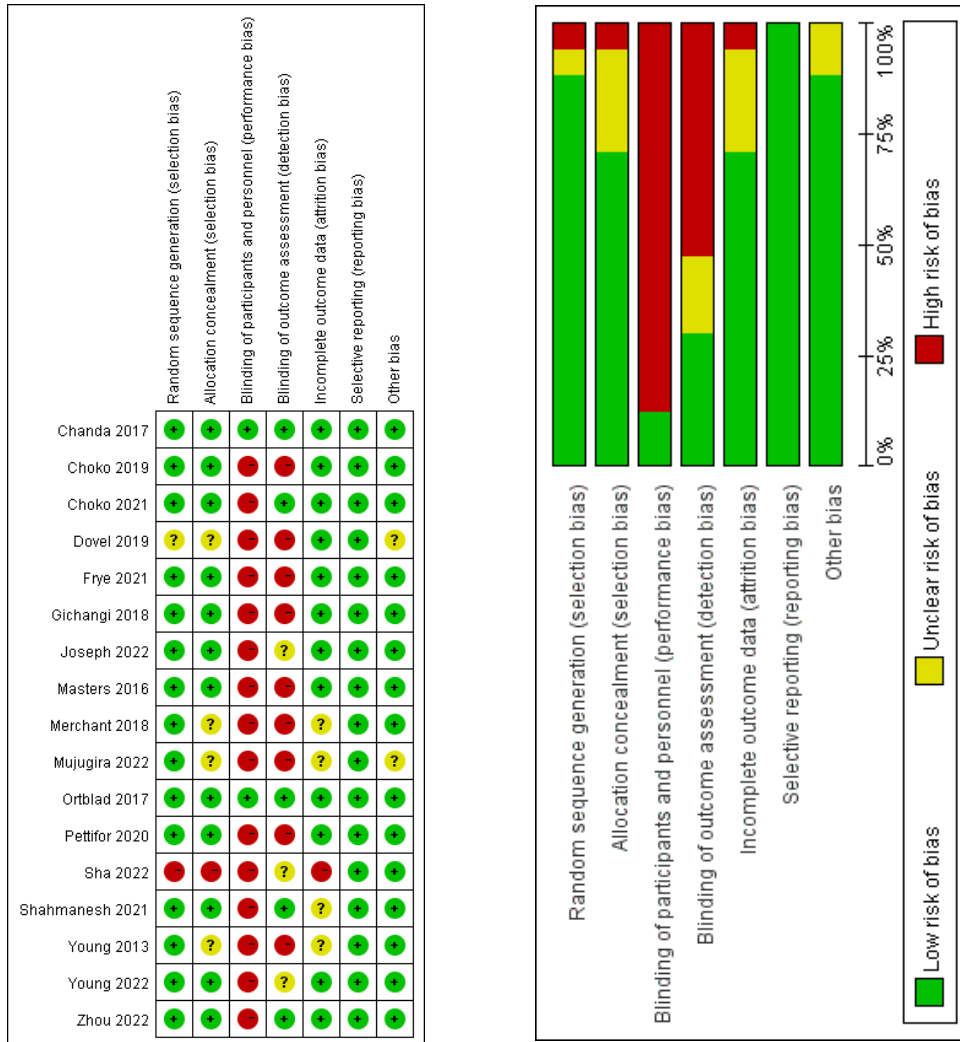

Figure S1. Cochrane risk of bias quality assessment for included studies: RCTs
